# Supplementary material for: Development of Non-Spherical Platinum Nanoparticles on Carbon Supports for Oxygen Reduction Reaction
Source: MDPI journal article supplement (doi:10.3390/catal13101322), 2023-09-25
Supplement: s1 [file s1]

### Supporting Information

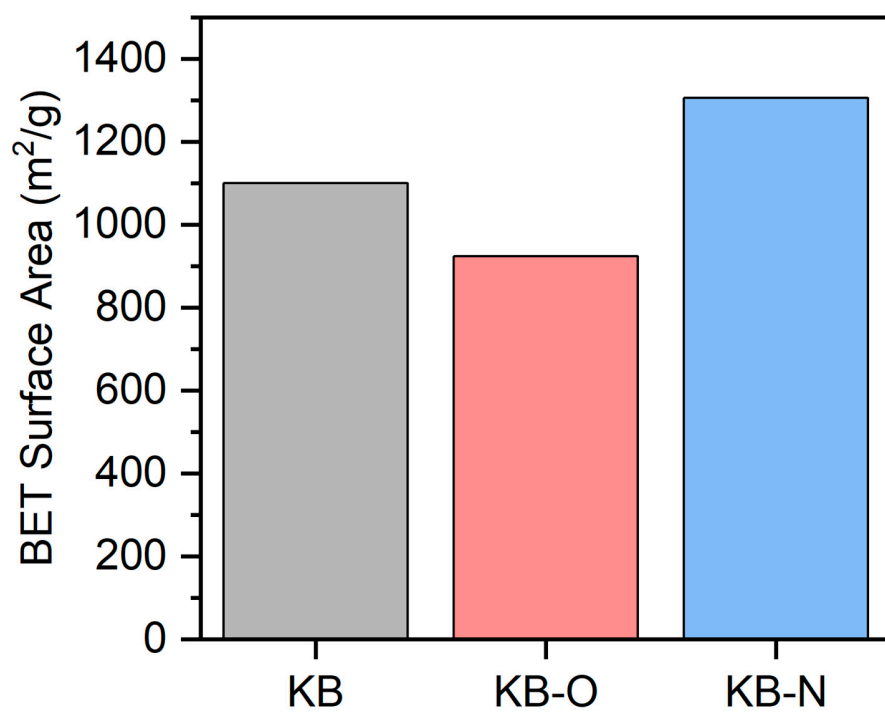

Figure S1 Plot for BET surface area.

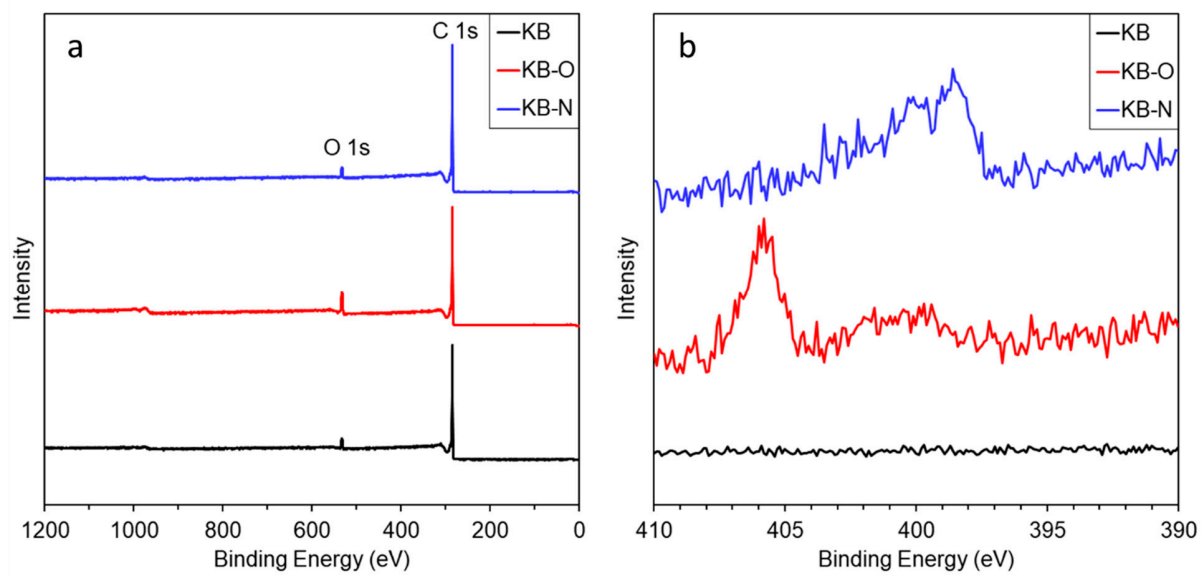

Figure S2 a and b) XPS survey spectra.

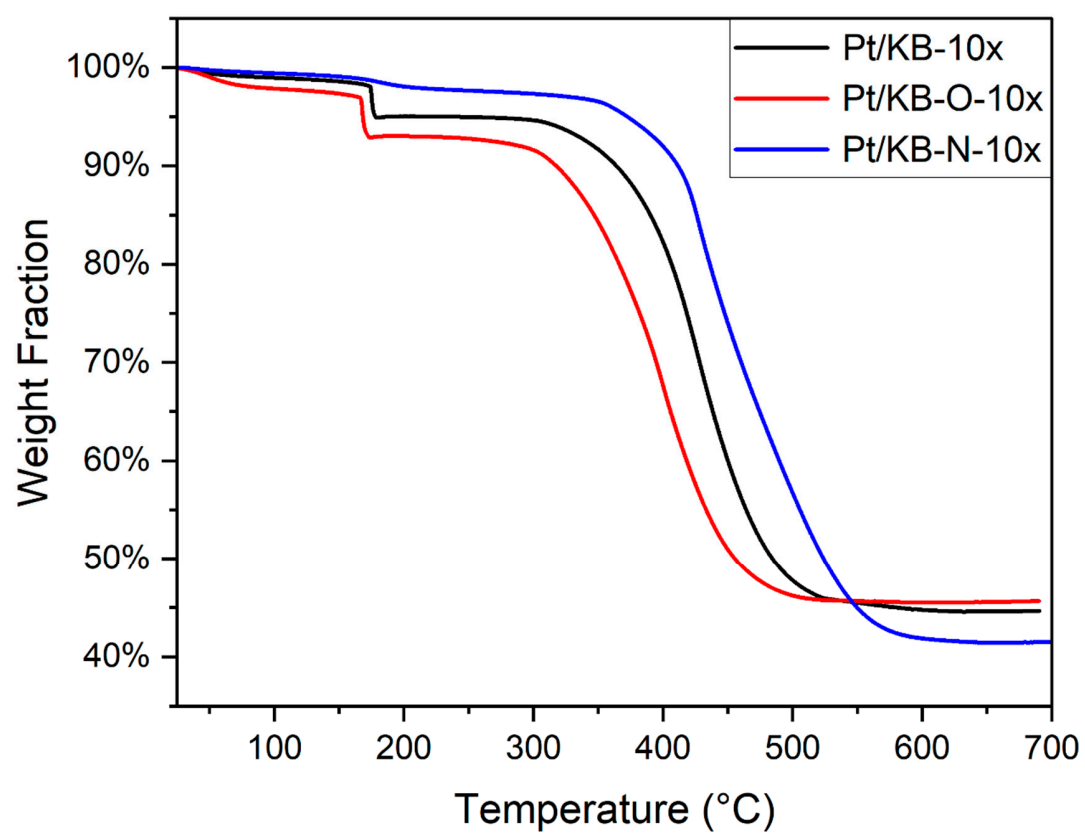

Figure S3 TGA plot for the samples.

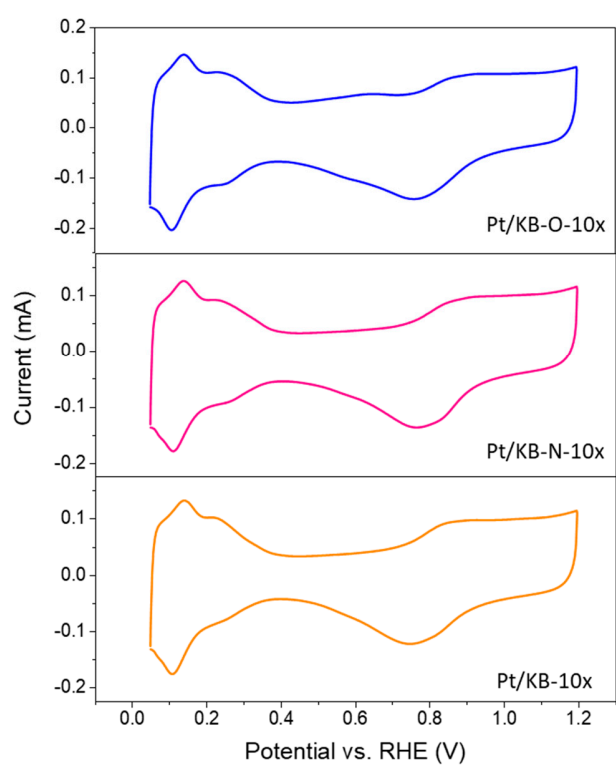

Figure S4 CV curves of the as-synthesized samples.
